# Supplementary material for: Sensitive 3-chlorophenol sensor development based on facile Er2O3/CuO nanomaterials for environmental safety
Source: Royal Society of Chemistry journal article supplement (doi:10.1039/c8nj00098k), 2018-01-01
Supplement: c8nj00098k1.pdf [file c8nj00098k1.pdf]

## **Electronic Supplemental Materials**

**Sensitive 3-chlorophenol sensor development based on facile**

**Er<sub>2</sub>O<sub>3</sub>/CuO nanomaterials for environmental safety**

**Tahir Ali Sheikh<sup>a,b</sup>, Mohammed M. Rahman<sup>a,b,\*</sup>, Abdullah M. Asiri<sup>a,b</sup>, Hadi M. Marwani<sup>a,b</sup>**

*<sup>a</sup>Chemistry department, Faculty of Science, King Abdulaziz University, Jeddah 21589, Saudi Arabia*

*<sup>b</sup>Center of Excellence for Advanced Materials Research (CEAMR), Faculty of Science, King Abdulaziz University, Jeddah 21589, Saudi Arabia*

**\*Corresponding address:**

**Dr. M.M. Rahman,**

Center of Excellence for Advanced Materials Research &

Chemistry Department, Faculty of Science,

King Abdulaziz University, Jeddah 21589,

P.O. Box 80203, Saudi Arabia

Email: [mmrahman@kau.edu.sa](mailto:mmrahman@kau.edu.sa) & [mmrahmanh@gmail.com](mailto:mmrahmanh@gmail.com)

Phone: +966-59-6421830; Fax: +966-026952292

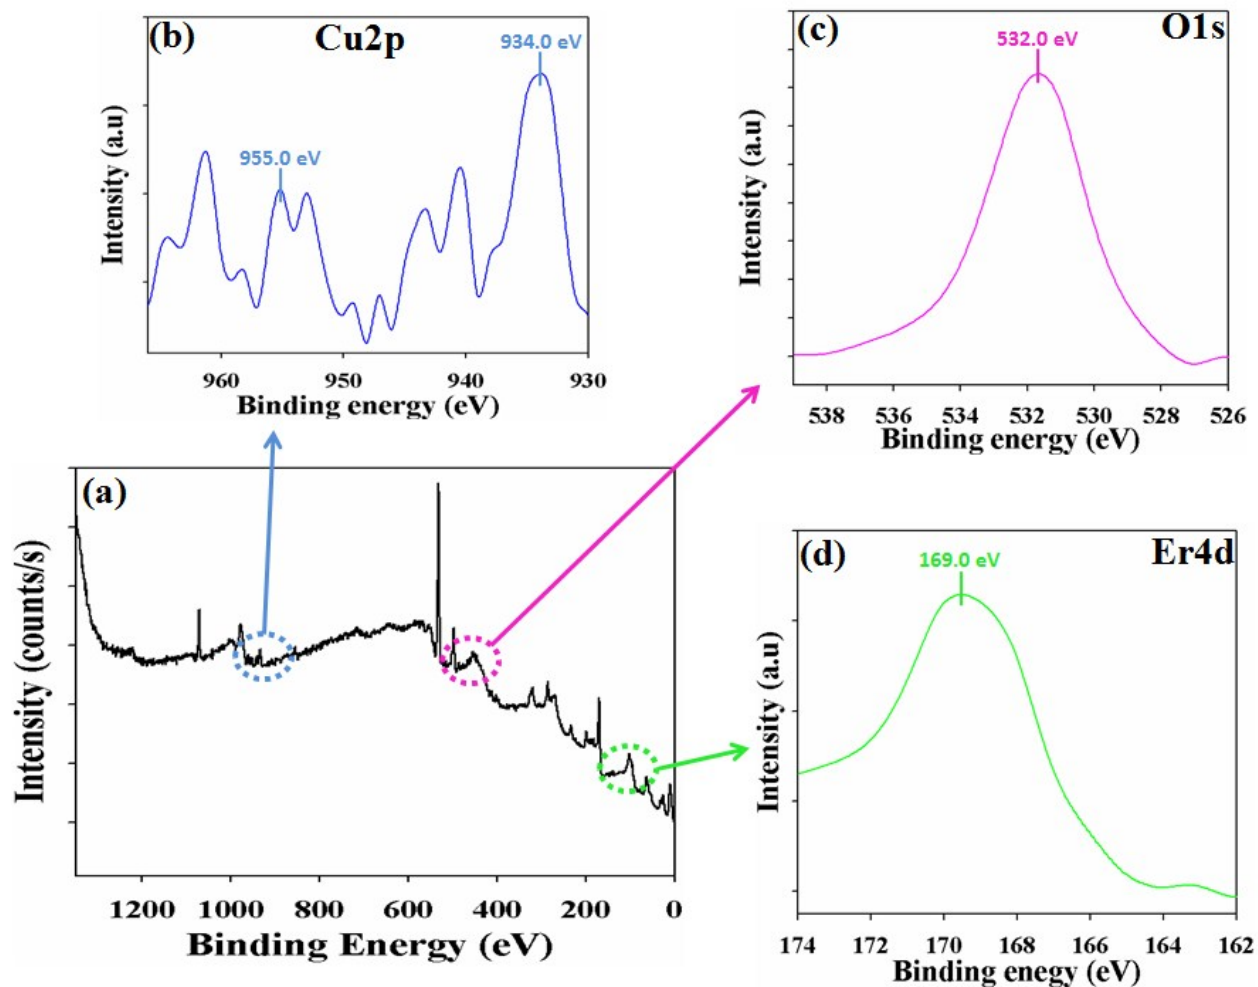

**Fig. S1:** Evaluation of binding energy analysis (XPS) for Erbium oxide-Copper oxide doped nanomaterials at normal condition (a) Er<sub>2</sub>O<sub>3</sub>/CuO nanomaterials (b) Cu2p (c) O1s (d) Er4d.

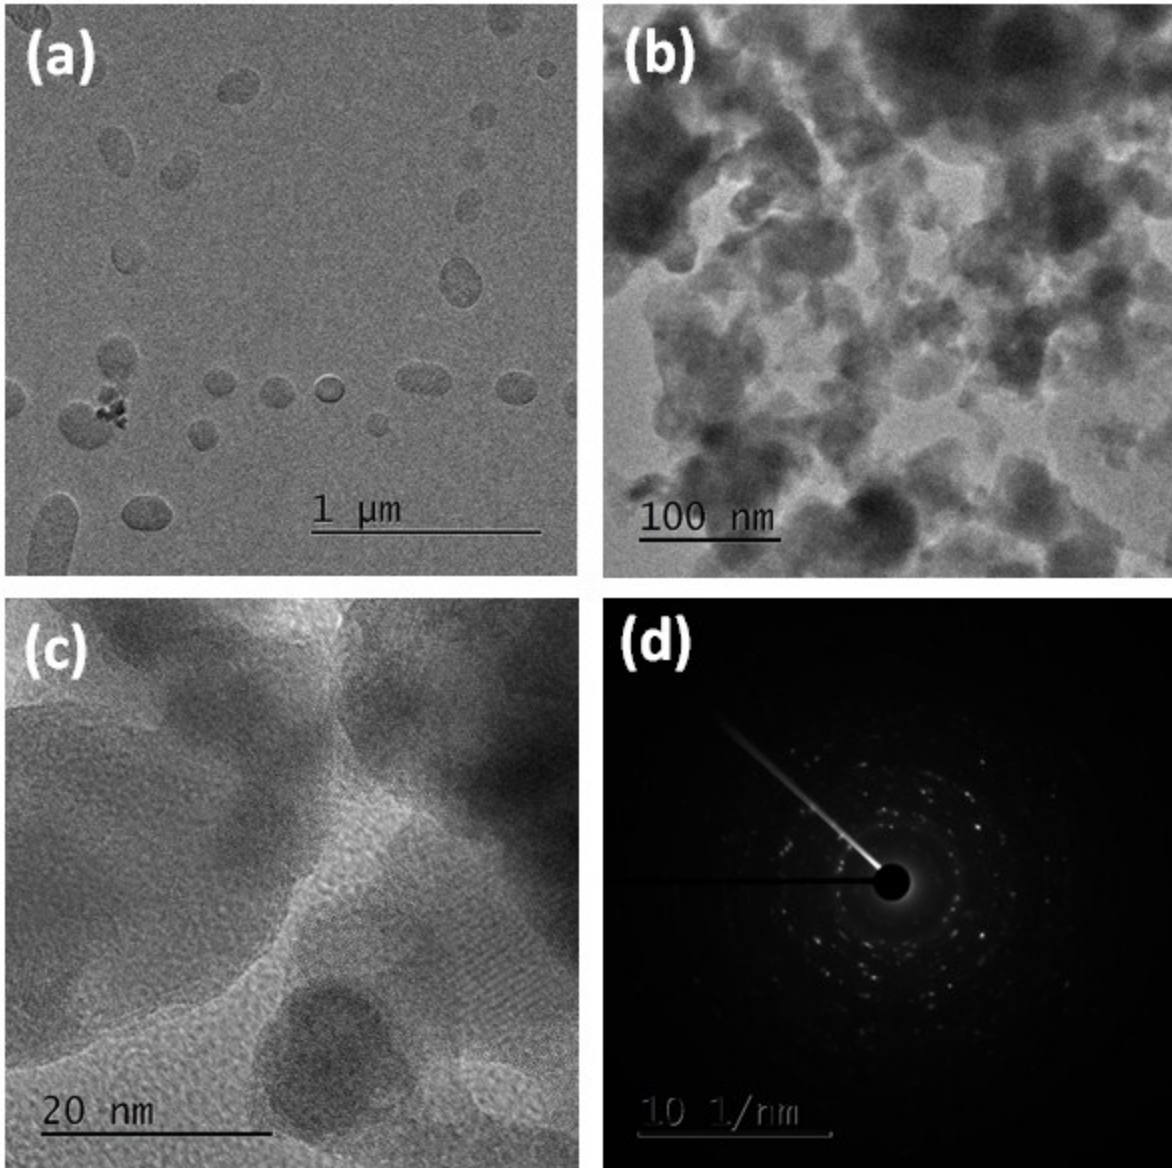

**Fig. S2.** TEM analysis. (a-b) Low-to-high magnified image of  $\text{Er}_2\text{O}_3/\text{CuO}$  nanomaterial, (c) High-resolution TEM image of  $\text{Er}_2\text{O}_3/\text{CuO}$  nanomaterial with lattice fringes (0.16 nm), and (d) SAED pattern images of corresponding structures indicated with a colored arrow.

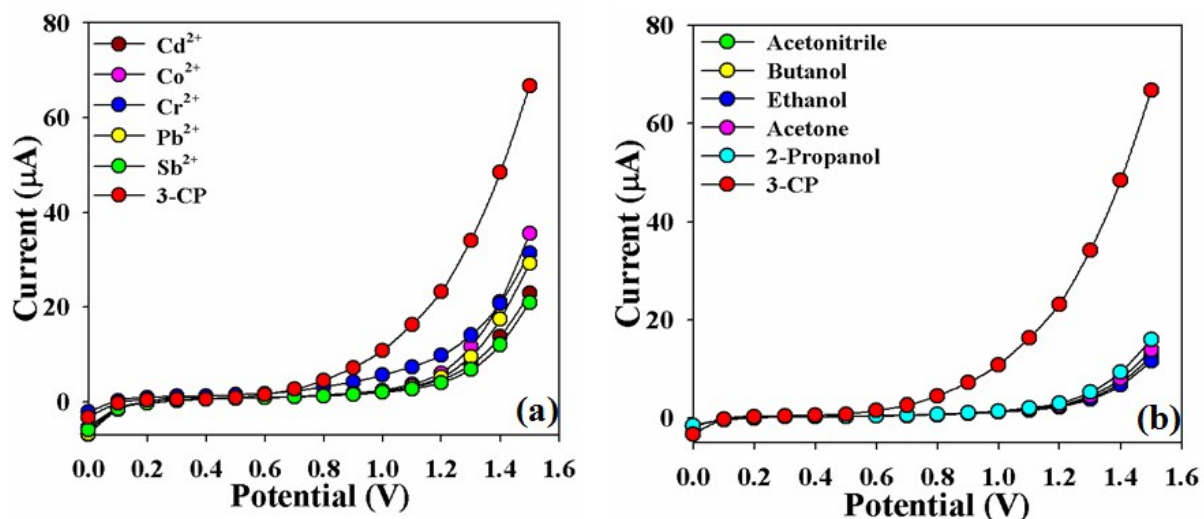

**Fig. S3:** Selectivity; (a) Current response of inorganic ions in the presence of 3-CP and analytes concentration were taken at  $0.1 \mu\text{M}$  (b) Current response of organic compounds in the presence of 3-CP and analytes concentration were taken at  $0.1 \mu\text{M}$

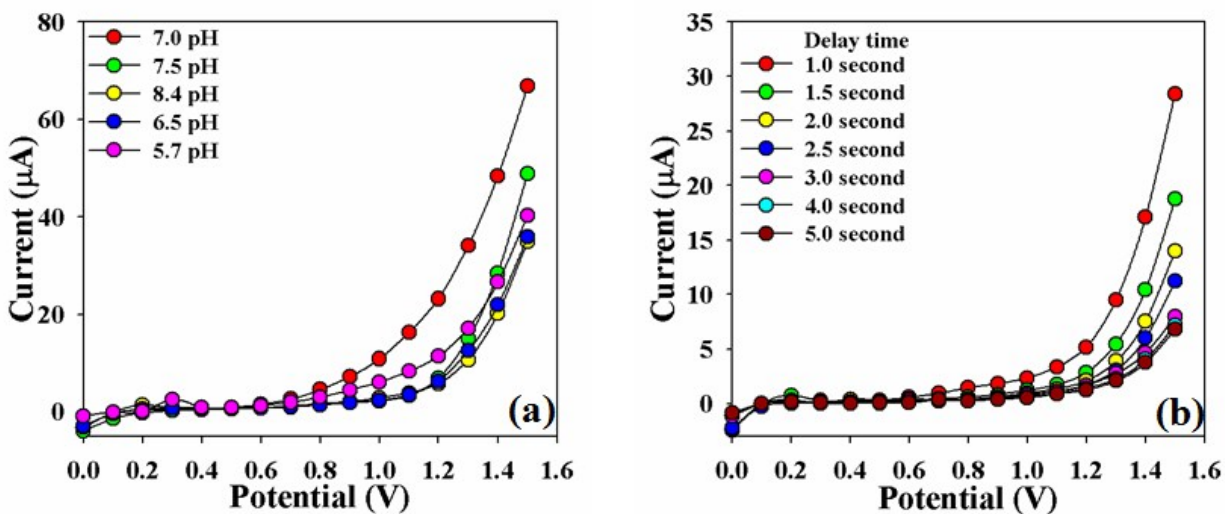

**Fig S4:** optimization of operational condition; (a) Effect of pH and (b) scan rate

**Table S1:** Interference Effect of various toxic chemicals on Er<sub>2</sub>O<sub>3</sub>/CuO NBs/Nafion/GCE

| Toxic Chemicals    | Observed Current ( $\mu\text{A}$ ) |                      |                      |                      | Interference effect (%) | SD (n = 3)          | RSD (%) (n = 3)    |
|--------------------|------------------------------------|----------------------|----------------------|----------------------|-------------------------|---------------------|--------------------|
|                    | R1                                 | R2                   | R3                   | Average              |                         |                     |                    |
| <b><u>3-CP</u></b> | <b><u>4.5612</u></b>               | <b><u>4.6783</u></b> | <b><u>4.5159</u></b> | <b><u>4.5851</u></b> | <b><u>100</u></b>       | <b><u>0.083</u></b> | <b><u>1.82</u></b> |
| <b>2,4-DNP</b>     | 2.9195                             | 2.9019               | 2.8673               | 2.8962               | 63                      | 0.026               | 0.91               |
| <b>2-NP</b>        | 0.6455                             | 0.6528               | 0.6549               | 0.6510               | 14                      | 0.004               | 0.75               |
| <b>3-MP</b>        | 2.4977                             | 2.4285               | 2.5683               | 2.4981               | 54                      | 0.069               | 2.79               |
| <b>4-AP</b>        | 0.6532                             | 0.6094               | 0.6396               | 0.6340               | 13                      | 0.022               | 3.53               |
| <b>4-MP</b>        | 1.6978                             | 1.6835               | 1.6937               | 1.6916               | 36                      | 0.007               | 0.43               |
| <b>BPA</b>         | 1.0244                             | 1.0623               | 1.1463               | 1.0776               | 23                      | 0.062               | 5.78               |
| <b>HDN</b>         | 1.0406                             | 1.0738               | 1.0635               | 1.0593               | 23                      | 0.016               | 1.60               |
| <b>Ph-HDN</b>      | 2.5749                             | 2.5796               | 2.5978               | 2.5841               | 56                      | 0.012               | 0.46               |
| <b>p-NP</b>        | 1.6187                             | 1.6039               | 1.6168               | 1.6131               | 35                      | 0.008               | 0.49               |

“Interference effect of 3-CP is consider to be 100 % ; R = reading; SD = standard deviation; and RSD = relative standard deviation.”
